# Supplementary material for: Molecular squares of NiII and CuII: ferromagnetic exchange interaction mediated by syn–anti carboxylate-bridging
Source: Royal Society of Chemistry journal article supplement (doi:10.1039/b905463d), 2009-01-01
Supplement: b905463d.pdf [file b905463d.pdf]

## Electronic Supplementary Information (ESI)

### Molecular squares of Ni<sup>II</sup> and Cu<sup>II</sup>: ferromagnetic exchange interaction mediated by syn-anti carboxylate-bridging

Himanshu Arora, Francesc Lloret and Rabindranath Mukherjee\*

Dalton Trans.

- |                                                                                              |            |
|----------------------------------------------------------------------------------------------|------------|
| 1. UV/VIS spectra                                                                            | Fig. S1-S4 |
| 2. Perspective view of complex <b>3</b>                                                      | Fig. S5    |
| 3. C–H <sup>⋯</sup> π interactions in <b>1</b>                                               | Fig. S6    |
| 4. C–H <sup>⋯</sup> O interactions in <b>3</b>                                               | Fig. S7    |
| 4. C–H <sup>⋯</sup> π and C–H <sup>⋯</sup> O parameters for <b>1</b> , <b>2</b> and <b>3</b> | Table S1   |

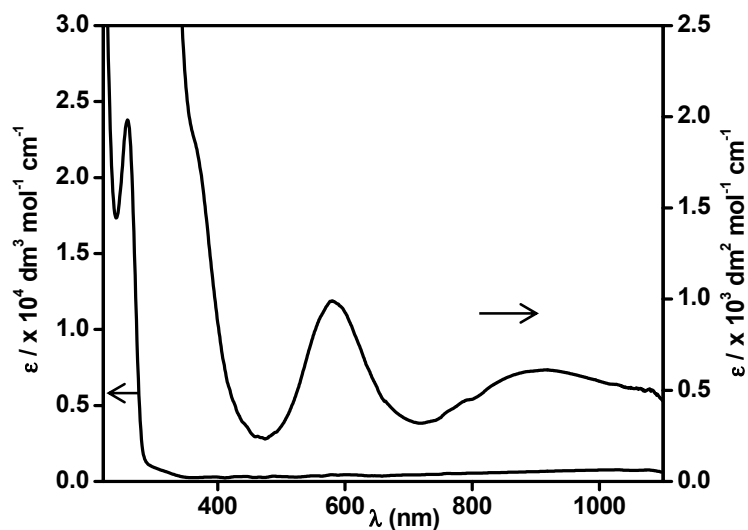

Fig. S1 UV-vis spectra of {[Ni<sup>II</sup>(L<sup>2</sup>)]}[ClO<sub>4</sub>]<sub>4</sub>·MeCN (**1**) in MeCN.

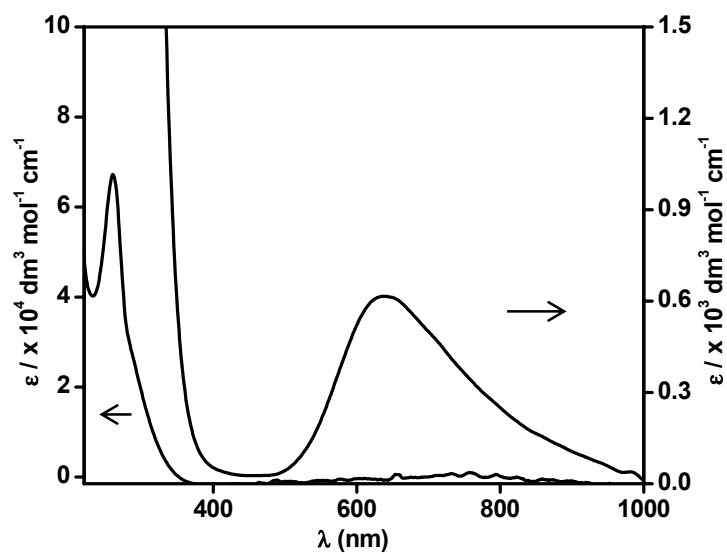

**Fig. S2** UV-vis spectra of  $\{[\text{Cu}^{\text{II}}(\text{L}^1)(\text{O}_3\text{SCF}_3)]\}_4\cdot\text{H}_2\text{O}$  (**2**) in MeCN.

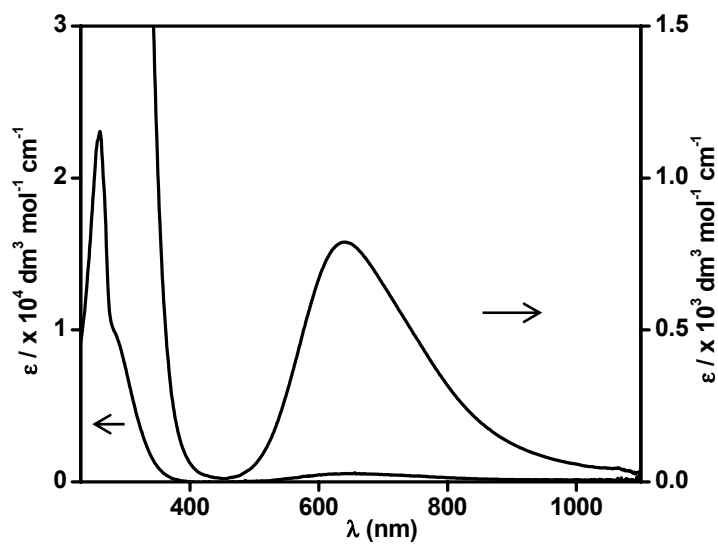

**Fig. S3** UV-vis spectra of  $\{[\text{Cu}^{\text{II}}(\text{L}^3)(\text{OCIO}_3)]\}_4\cdot\text{MeCN}$  (**3**) in MeCN.

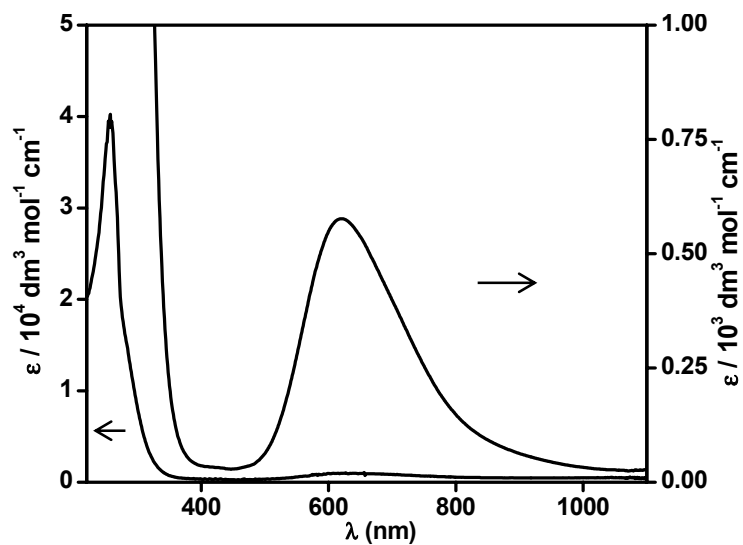

**Fig. S4** UV-vis spectra of  $\{[\text{Cu}^{\text{II}}(\text{L}^4)][\text{ClO}_4]\}_4 \cdot 3\text{MeCN} \cdot 4\text{H}_2\text{O}$  (**4**) in MeCN.

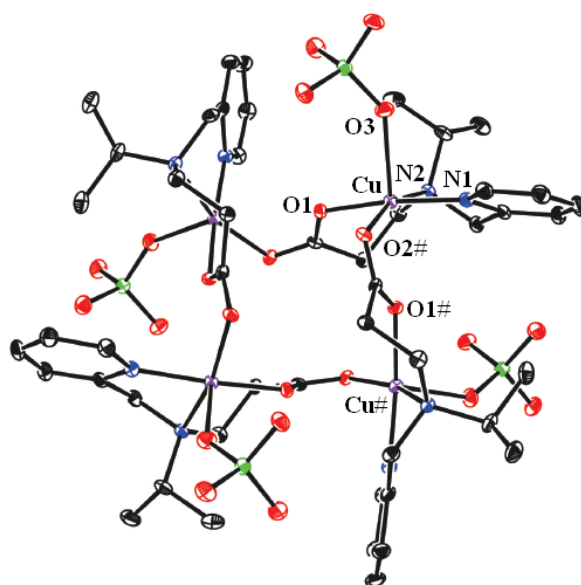

**Fig. S5** View of the metal coordination environment in the crystals of  $\{[\text{Cu}^{\text{II}}(\text{L}^3)(\text{OCIO}_3)]\}_4 \cdot \text{MeCN}$  (**3**) at 30 % thermal ellipsoids probability. Hydrogen atoms are omitted for clarity.

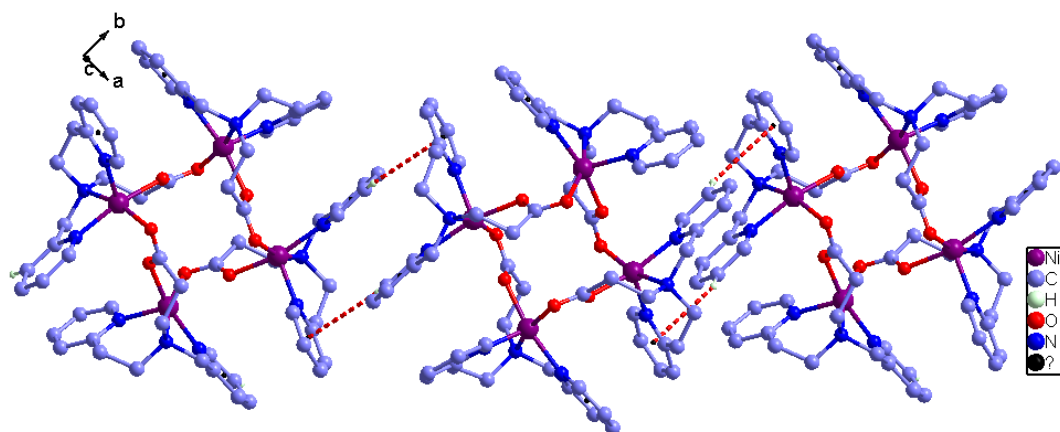

Fig. S6 C-H... $\pi$  interactions in  $\{[\text{Ni}^{\text{II}}(\text{L}^2)][\text{ClO}_4]\}_4\text{MeCN}$  (1).

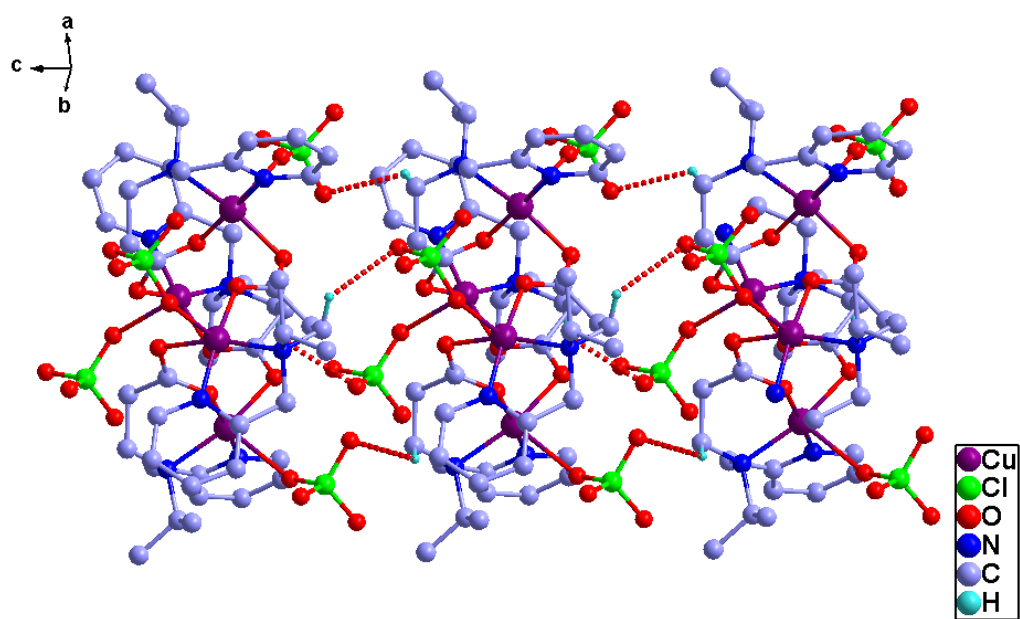

Fig. S7 C-H...O interactions in  $\{[\text{Cu}^{\text{II}}(\text{L}^3)(\text{OCIO}_3)]\}_4\text{MeCN}$  (3)

**Table S1** C–H $\cdots$  $\pi$  and C–H $\cdots$ O parameters for **1**, **2** and **3**.

| Complex  | D–H $\cdots$ A         | H $\cdots$ A, Å       | D $\cdots$ A, Å           | D–H $\cdots$ A                          |
|----------|------------------------|-----------------------|---------------------------|-----------------------------------------|
| <b>1</b> | C12–H12 $\cdots$ $\pi$ | 3.403                 | 4.1733(10)                | 141.781 <sup>o</sup> [ <sup>i</sup> ]   |
| <b>2</b> | C8–H8A $\cdots$ O5     | 2.377 <sup>[ii]</sup> | 3.4468(3) <sup>[ii]</sup> | 170.163 <sup>o</sup> [ <sup>iii</sup> ] |
| <b>3</b> | C10–H10A $\cdots$ O4   | 2.635 <sup>[ii]</sup> | 3.4163(9) <sup>[ii]</sup> | 128.572 <sup>o</sup> [ <sup>iii</sup> ] |

(i)  $0.5 + x, -0.5 + y, 2 - z$ . (ii)  $x, y, -1 + z$ . (iii)  $x, y, 1 + z$ .
